# Supplementary material
Source: MDPI journal article supplement (https://www.mdpi.com/2218-0532/91/4/56)
Supplement: s1 [file s1]

## ***Supplementary data***

SSTAT3 Inhibitory Activities of Lignans Isolated from the Stems of *Lindera obtusiloba*

Blume

Eun-Jae Park <sup>1,2</sup>, Hee Ju Lim <sup>1,2</sup>, Hyung Jin Lim <sup>1</sup>, Bong-Sik Yun <sup>2</sup>, Soyoung Lee <sup>1</sup>, Seung-Jae Lee <sup>1</sup> and Seung Woong Lee <sup>1,\*</sup>

<sup>1</sup> Functionality Biomaterial Research Center, Korea Research Institute of Bioscience and Biotechnology, Jeonbuk 56212, Republic of Korea; pej911029@kribb.re.kr (E.-J.P.); limhj09@kribb.re.kr (H.J.L.); lhjin@kribb.re.kr (H.J.L.); sylee@kribb.re.kr (S.L.); seung99@kribb.re.kr (S.-J.L.)

<sup>2</sup> Division of Biotechnology and Advanced Institute of Environment and Bioscience, College of Environmental and Bioresource Sciences, Jeonbuk National University, Iksan-si 54596, Republic of Korea; bsyun@jbnu.ac.kr

\* Correspondence: lswdoc@kribb.re.kr

## Figure legends

**Figure S1.**  $^1\text{H}$  NMR spectrum of compound **1**

**Figure S2.**  $^{13}\text{C}$  NMR spectrum of compound **1**

**Figure S3.**  $^1\text{H}$  NMR spectrum of compound **2**

**Figure S4.**  $^{13}\text{C}$  NMR spectrum of compound **2**

**Figure S5.**  $^1\text{H}$  NMR spectrum of compound **3**

**Figure S6.**  $^{13}\text{C}$  NMR spectrum of compound **3**

**Figure S7.**  $^1\text{H}$  NMR spectrum of compound **4**

**Figure S8.**  $^{13}\text{C}$  NMR spectrum of compound **4**

**Figure S9.**  $^1\text{H}$  NMR spectrum of compound **5**

**Figure S10.**  $^{13}\text{C}$  NMR spectrum of compound **5**

**Figure S11.**  $^1\text{H}$  NMR spectrum of compound **6**

**Figure S12.**  $^{13}\text{C}$  NMR spectrum of compound **6**

**Figure S13.**  $^1\text{H}$  NMR spectrum of compound **7**

**Figure S14.**  $^{13}\text{C}$  NMR spectrum of compound **7**

**Figure S15.** Cytotoxic activity of compounds. (A) Compound **1**; (B) Compound **4**; (C) Compound **5**

## **Table legends**

**Table S1.**  $^{13}\text{C}$  NMR spectrum data of compound **1**

**Table S2.**  $^{13}\text{C}$  NMR spectrum data of compound **2**

**Table S3.**  $^{13}\text{C}$  NMR spectrum data of compound **3**

**Table S4.**  $^{13}\text{C}$  NMR spectrum data of compound **4**

**Table S5.**  $^{13}\text{C}$  NMR spectrum data of compound **5**

**Table S6.**  $^{13}\text{C}$  NMR spectrum data of compound **6**

**Table S7.**  $^{13}\text{C}$  NMR spectrum data of compound **7**

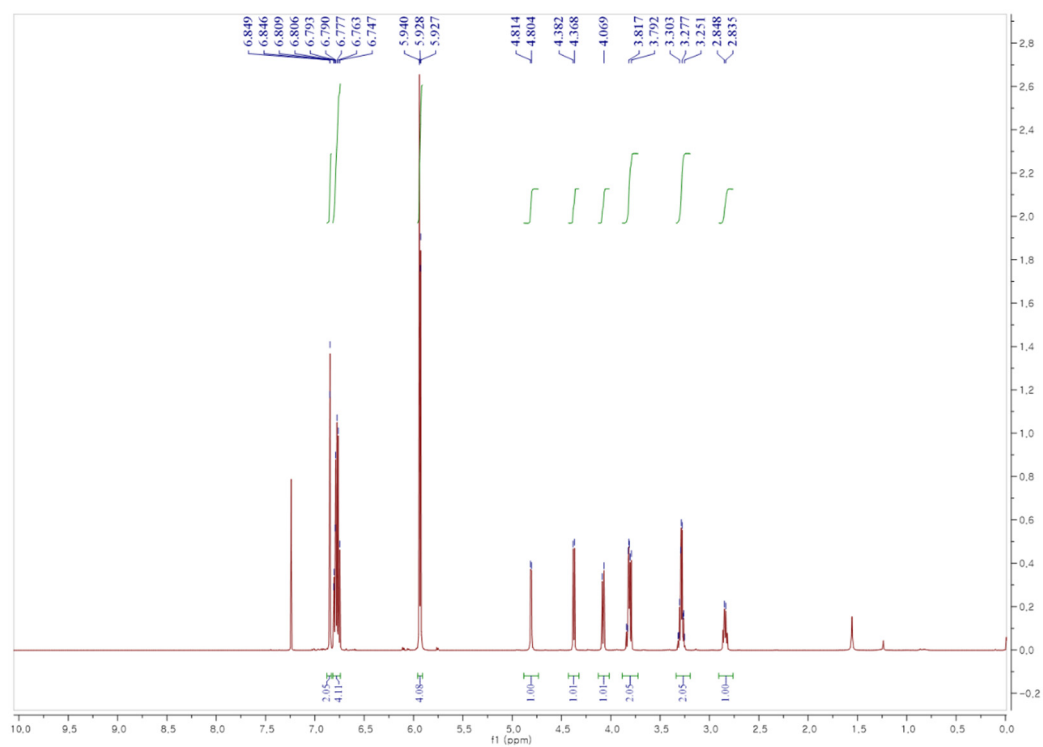

**Figure S1.** <sup>1</sup>H NMR spectrum of compound **1**

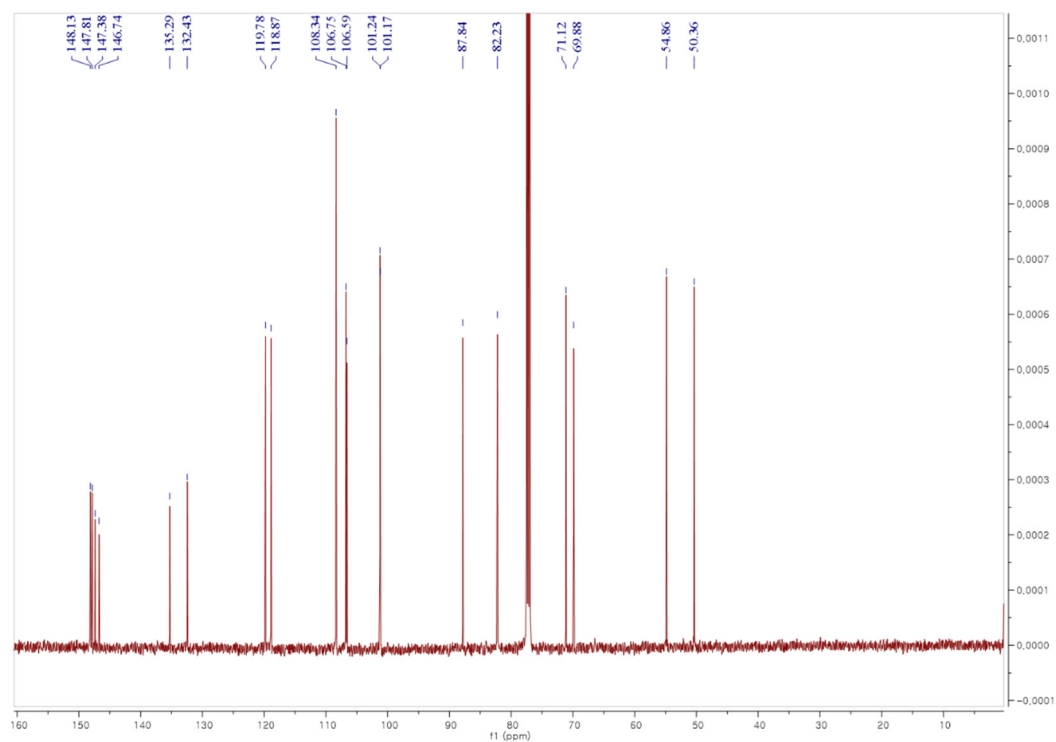

**Figure S2.** <sup>13</sup>C NMR spectrum of compound **1**

**Table S1.** <sup>13</sup>C NMR spectrum data of compound **1**

| Positions            | Paper Citation                   | Reference <sup>a</sup>                      |
|----------------------|----------------------------------|---------------------------------------------|
|                      | (150 MHz, chloroform- <i>d</i> ) | (100 MHz, pyridine- <i>d</i> <sub>5</sub> ) |
|                      | δ <sub>c</sub>                   | δ <sub>c</sub>                              |
| C-1                  | 54.86                            | 55.31                                       |
| C-2                  | 87.84                            | 87.89                                       |
| C-4                  | 71.72                            | 71.13                                       |
| C-5                  | 50.36                            | 50.54                                       |
| C-6                  | 82.83                            | 82.15                                       |
| C-8                  | 69.88                            | 69.93                                       |
| C-1'                 | 135.29                           | 135.1                                       |
| C-2'                 | 106.75                           | 106.4                                       |
| C-3'                 | 148.13                           | 147.4                                       |
| C-4'                 | 147.81                           | 148.2                                       |
| C-5'                 | 108.34                           | 108.2                                       |
| C-6'                 | 119.79                           | 119.6                                       |
| C-1''                | 132.43                           | 132.3                                       |
| C-2''                | 106.59                           | 106.4                                       |
| C-3''                | 146.74                           | 147.4                                       |
| C-4''                | 147.38                           | 147.9                                       |
| C-5''                | 108.34                           | 108.2                                       |
| -OCH <sub>2</sub> O- | 101.17                           | 101.0                                       |
| -OCH <sub>2</sub> O- | 101.24                           | 101.1                                       |

<sup>a</sup>Seo, K.H.; Baek, M.Y.; Lee, D.Y.; Cho, J.G. Isolation of Flavonoids and Lignans from the Stem Wood of *Lindera Obtusioba* Blume. *J Appl Biol Chem.* **2011**, *54.3*, 178-183.

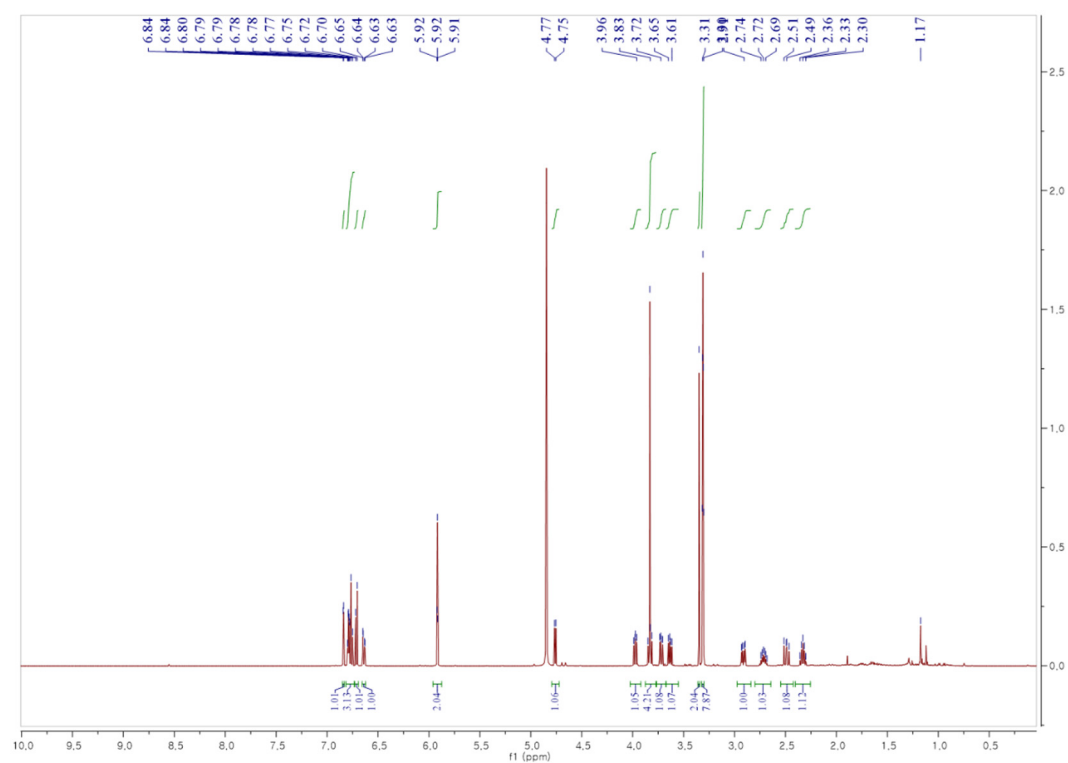

**Figure S3.** <sup>1</sup>H NMR spectrum of compound **2**

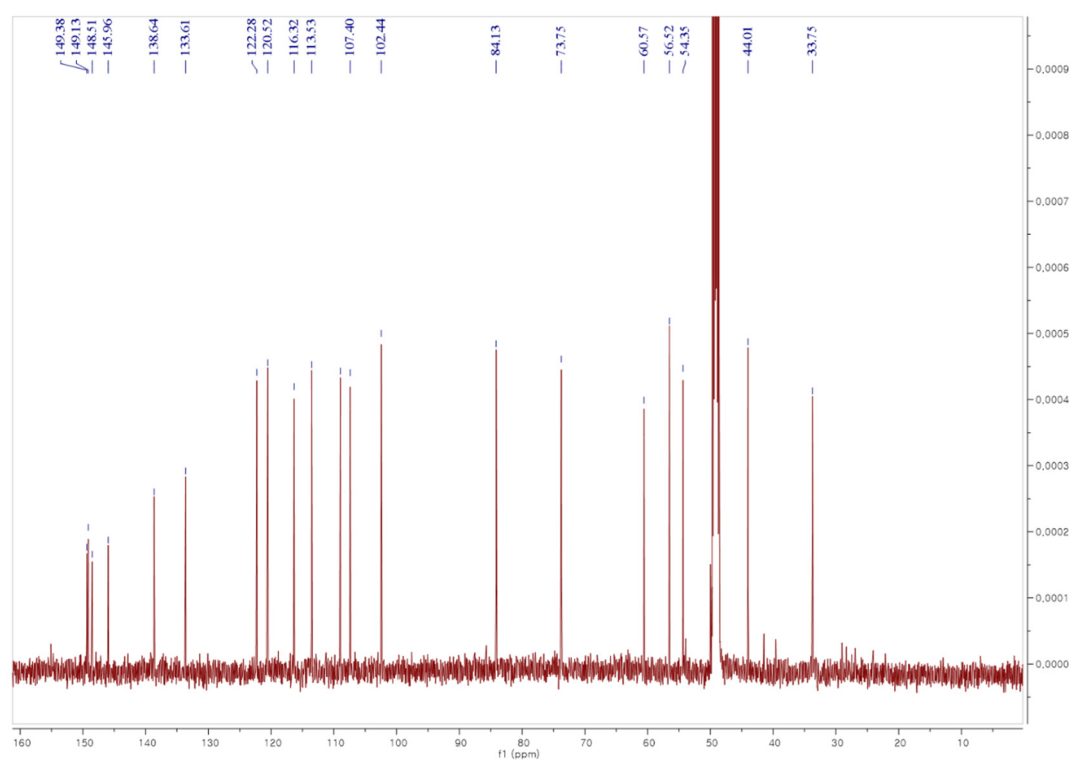

**Figure S4.** <sup>13</sup>C NMR spectrum of compound **2**

**Table S2.**  $^{13}\text{C}$  NMR spectrum data of compound **2**

| Positions              | Paper Citation                   | Reference <sup>a</sup>          |
|------------------------|----------------------------------|---------------------------------|
|                        | (150 MHz, chloroform- <i>d</i> ) | (75 MHz, chloroform- <i>d</i> ) |
|                        | $\delta_{\text{C}}$              | $\delta_{\text{C}}$             |
| C-1                    | 133.61                           | 132.2                           |
| C-2                    | 122.28                           | 121.2                           |
| C-3                    | 116.63                           | 114.3                           |
| C-4                    | 145.96                           | 143.9                           |
| C-5                    | 149.13                           | 146.8                           |
| C-6                    | 113.53                           | 111.1                           |
| C-7                    | 33.75                            | 33.2                            |
| C-8                    | 44.01                            | 42.4                            |
| C-9                    | 73.75                            | 72.9                            |
| C-1'                   | 138.64                           | 137.0                           |
| C-2'                   | 120.52                           | 119.0                           |
| C-3'                   | 108.97                           | 108.0                           |
| C-4'                   | 148.51                           | 146.5                           |
| C-5'                   | 149.38                           | 147.8                           |
| C-6'                   | 107.4                            | 106.3                           |
| C-7'                   | 84.13                            | 82.8                            |
| C-8'                   | 54.35                            | 52.7                            |
| C-9'                   | 60.57                            | 60.9                            |
| -O-CH <sub>2</sub> -O- | 102.44                           | 100.9                           |
| -O-CH <sub>3</sub> -5  | 56.52                            | 55.9                            |

<sup>a</sup>Jang, H.J.; Lim, H.J.; Park, E.J.; Lee, S.J.; Lee, S.; Lee, S.W.; Rho, M.C. STAT3-inhibitory activity of sesquiterpenoids and diterpenoids from *Curcuma phaeocaulis*. *Bioorganic Chemistry*. **2019**, 93, 103267; Liu, Z.; Saarinen, N.M.; Thompson, L.U. Sesamin is one of the major precursors of mammalian lignans in sesame seed (*Sesamum indicum*) as observed in vitro and in rats. *The Journal of Nutrition*. **2006**, 136.4, 906–912

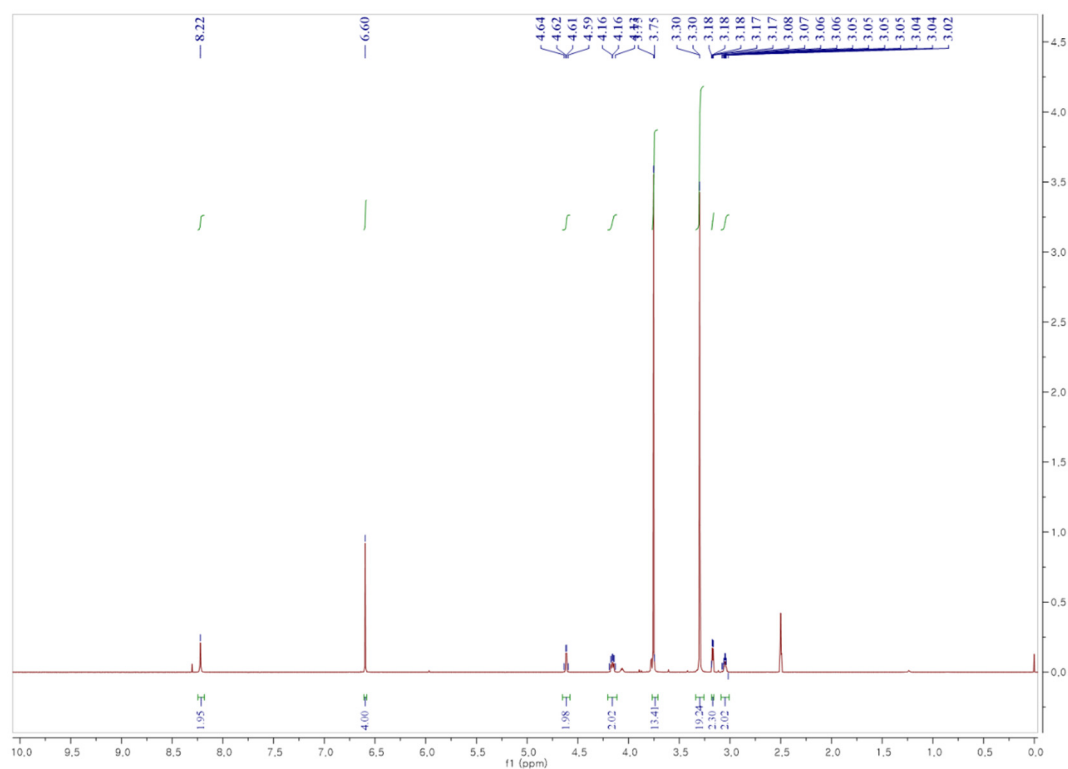

**Figure S5.** <sup>1</sup>H NMR spectrum of compound 3

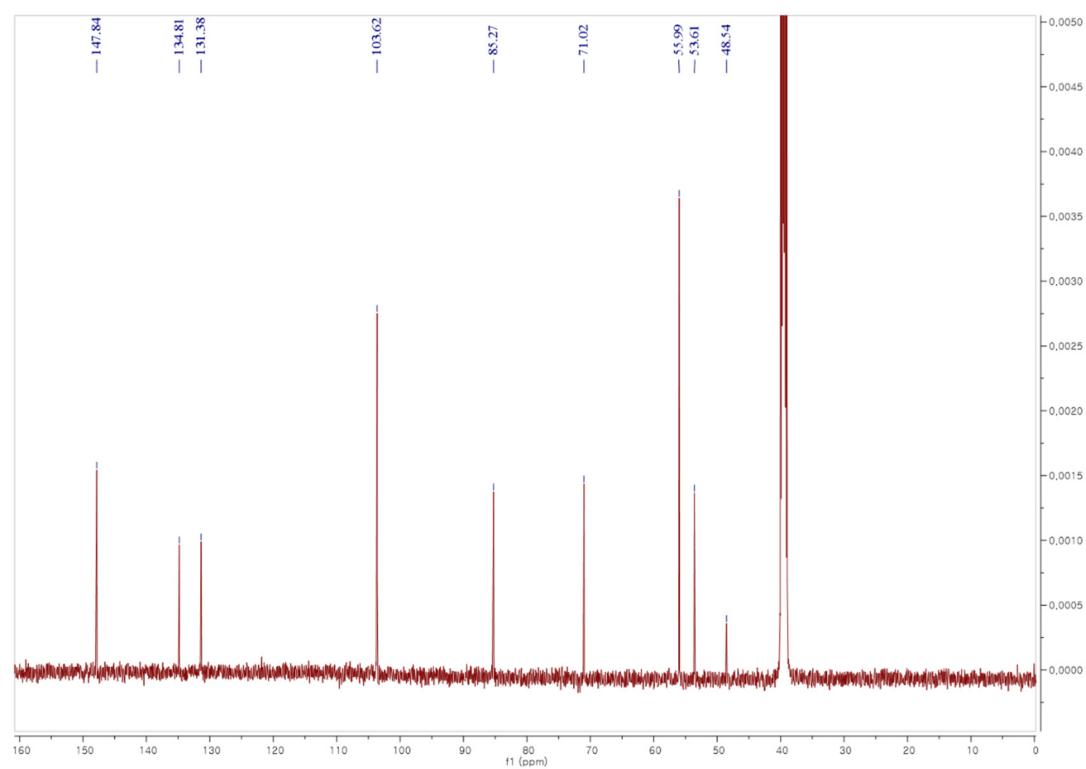

**Figure S6.** <sup>13</sup>C NMR spectrum of compound 3

**Table S3.**  $^{13}\text{C}$  NMR spectrum data of compound **3**

| Positions                         | Paper Citation          | Reference <sup>a</sup>      |
|-----------------------------------|-------------------------|-----------------------------|
|                                   | (150 MHz, DMSO- $d_6$ ) | (125 MHz, chloroform- $d$ ) |
|                                   | $\delta_{\text{C}}$     | $\delta_{\text{C}}$         |
| C-1                               | 53.61                   | 54.29                       |
| C-2                               | 85.27                   | 86.01                       |
| C-4                               | 71.02                   | 71.75                       |
| C-5                               | 53.61                   | 54.29                       |
| C-6                               | 85.27                   | 86.01                       |
| C-8                               | 71.02                   | 71.75                       |
| C-1'                              | 131.38                  | 132.04                      |
| C-2'                              | 103.62                  | 102.69                      |
| C-3'                              | 147.84                  | 147.13                      |
| C-4'                              | 134.81                  | 134.29                      |
| C-5'                              | 147.84                  | 147.13                      |
| C-6'                              | 103.62                  | 102.69                      |
| C-1''                             | 131.38                  | 132.04                      |
| C-2''                             | 103.62                  | 102.69                      |
| C-3''                             | 147.84                  | 147.13                      |
| C-4''                             | 134.81                  | 134.29                      |
| C-5''                             | 147.84                  | 147.13                      |
| C-6''                             | 103.62                  | 102.69                      |
| 3', 5', 3'', 5''-OCH <sub>3</sub> | 55.99                   | 54.29                       |

<sup>a</sup>Kwon, H.C.; Choi, S.U.; Lee, J.O.; Kwon, H.C.; Choi, S.U.; Lee, J.O.; Bae, K.H.; Zee, O.P. Lee, K.R. Two New Lignan from *Lindera obtusiloba* blume. Arch Pharm Res. **1999**, 22, 417-422.

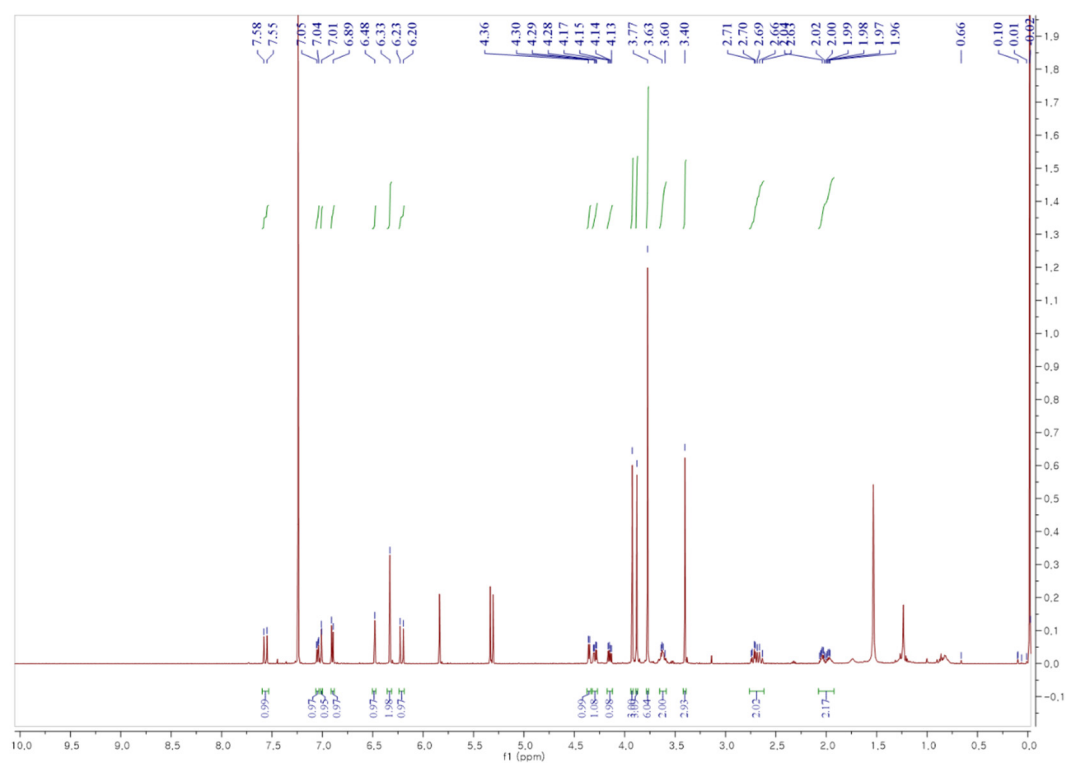

**Figure S7.** <sup>1</sup>H NMR spectrum of compound **4**

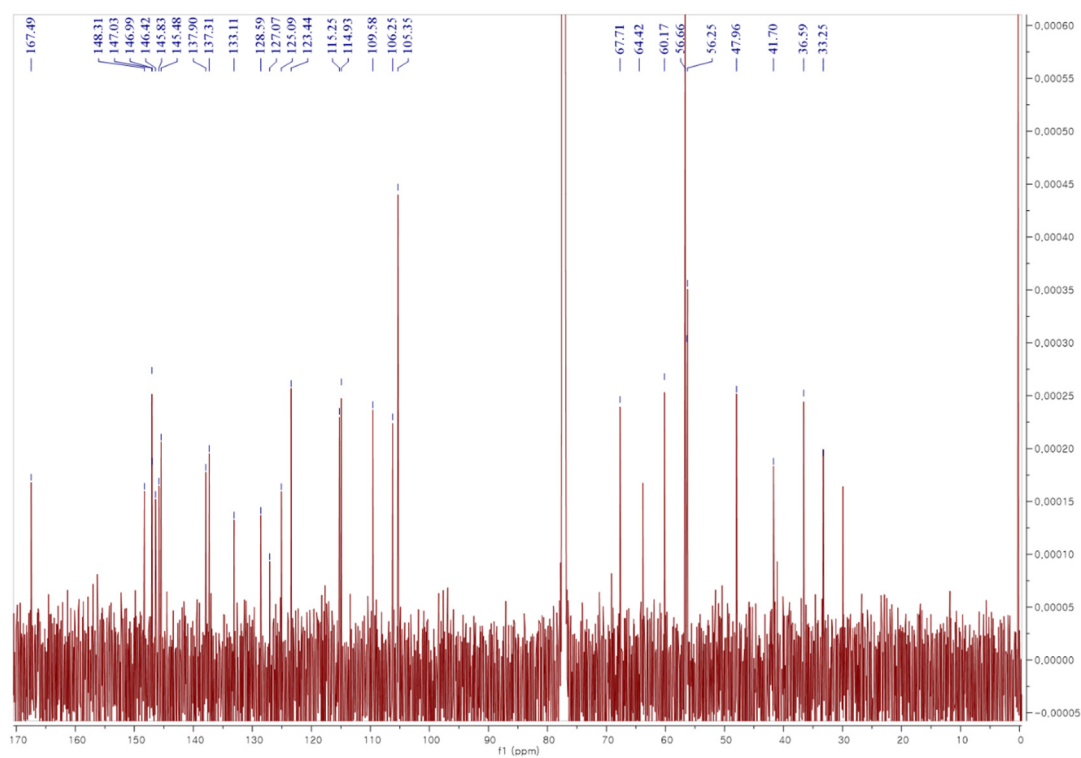

**Figure S8.** <sup>13</sup>C NMR spectrum of compound **4**

**Table S4.**  $^{13}\text{C}$  NMR spectrum data of compound **4**

| Positions | Paper Citation                   | Reference <sup>a</sup>           |
|-----------|----------------------------------|----------------------------------|
|           | (150 MHz, chloroform- <i>d</i> ) | (150 MHz, chloroform- <i>d</i> ) |
|           | $\delta_{\text{C}}$              | $\delta_{\text{C}}$              |
| C-1       | 125.12                           | 124.7                            |
| C-2       | 105.35                           | 105.0                            |
|           | 106.25                           | 106.1                            |
| C-4       | 137.31                           | 137.0                            |
|           | 146.42                           | 145.5                            |
| C-5       | 145.86                           | 145.3                            |
| C-6       | 105.35                           | 105.5                            |
|           | 128.62                           | 128.4                            |
| C-8       | 47.83                            | 47.83                            |
| C-9       | 67.71                            | 67.4                             |
| C-1'      | 137.94                           | 137.6                            |
| C-3'      | 146.99                           | 146.2                            |
|           | 147.03                           | 146.8                            |
| C-4'      | 133.11                           | 132.7                            |
|           | 146.99                           | 146.8                            |
| C-5'      | 147.03                           | 146.8                            |
|           | 147.03                           | 146.8                            |
| C-7'      | 41.7                             | 41.3                             |
| C-8'      | 47.83                            | 47.6                             |
| C-9'      | 63.82                            | 63.4                             |
| C-1''     | 127.04                           | 126.7                            |
| C-2''     | 109.58                           | 109.3                            |
| C-4''     | 148.38                           | 148.1                            |
| C-5''     | 114.93                           | 114.7                            |
| C-6''     | 123.44                           | 123.2                            |
| C-7''     | 145.52                           | 145.0                            |

**Table S4. continued**

| Positions               | Paper Citation                   | Reference                        |
|-------------------------|----------------------------------|----------------------------------|
|                         | (150 MHz, chloroform- <i>d</i> ) | (150 MHz, chloroform- <i>d</i> ) |
|                         | $\delta_c$                       | $\delta_c$                       |
| C-8''                   | 115.25                           | 114.9                            |
| C=O                     | 167.55                           | 167.4                            |
| 3-OCH <sub>3</sub>      | 56.25                            | 56.1                             |
| 5-OCH <sub>3</sub>      | 60.17                            | 59.9                             |
| 3', 5'-OCH <sub>3</sub> | 56.66                            | 56.6                             |
| 3''-OCH <sub>3</sub>    | 56.35                            | 56.3                             |

<sup>a</sup>Chen, T.H.; Huang, Y.H.; Lin, J.J. Cytotoxic lignan ester from *cinnamomum osmophloeum*. *Planta Med.* **2009**, *76.6*, 613-619.

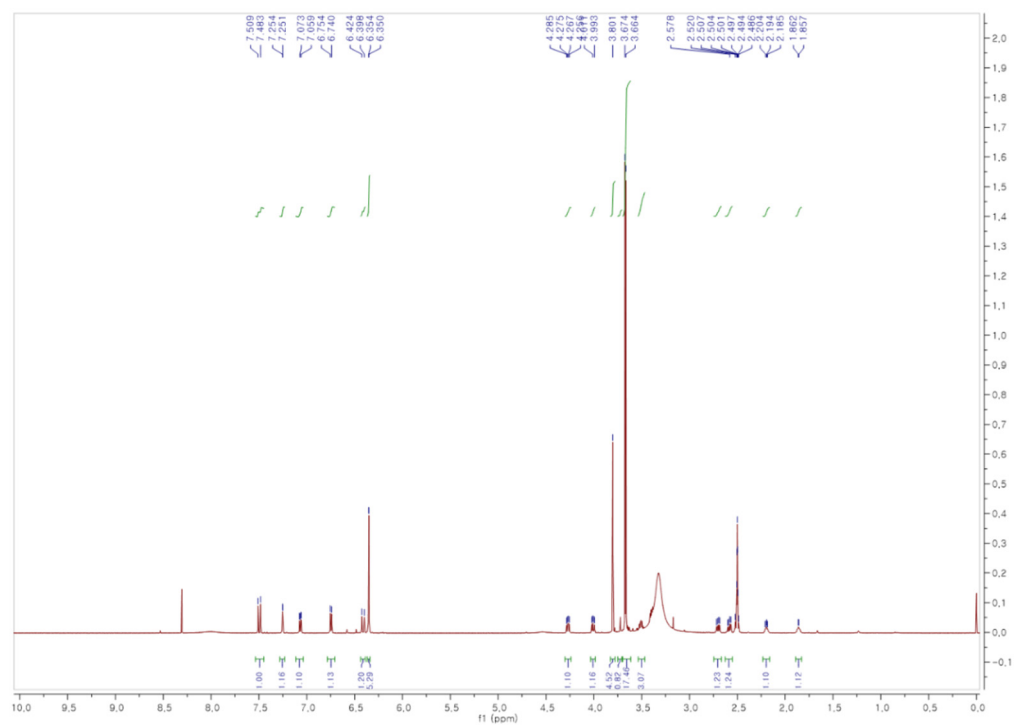

**Figure S9.**  $^1\text{H}$  NMR spectrum of compound **5**

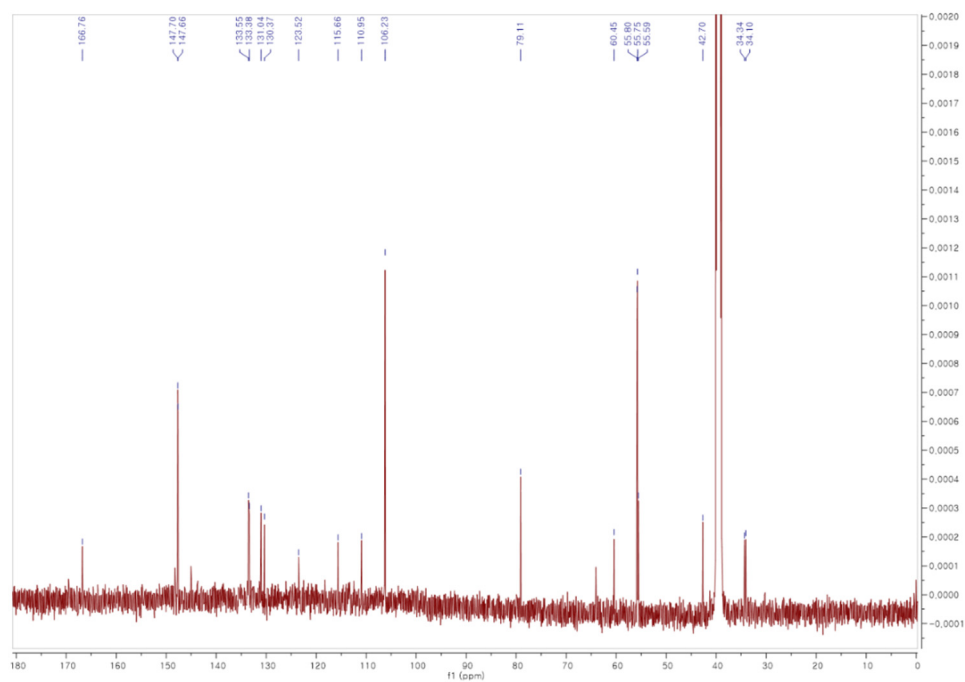

**Figure S10.**  $^{13}\text{C}$  NMR spectrum of compound **5**

**Table S5.** <sup>13</sup>C NMR spectrum data of compound **5**

| Positions | Paper Citation                          | Reference <sup>a</sup>           |
|-----------|-----------------------------------------|----------------------------------|
|           | (150 MHz, DMSO- <i>d</i> <sub>6</sub> ) | (150 MHz, chloroform- <i>d</i> ) |
|           | δ <sub>C</sub>                          | δ <sub>C</sub>                   |
| C-1       | 130.37                                  | 126.7                            |
| C-2       | 106.23                                  | 106.1                            |
| C-3       | 147.66                                  | 145.3                            |
|           | 147.71                                  |                                  |
| C-4       | 133.38                                  | 137.0                            |
|           | 133.55                                  | 132.7                            |
| C-5       | 147.66                                  | 145.3                            |
|           | 147.71                                  | 145.5                            |
| C-6       | 106.23                                  | 106.1                            |
| C-7       | 34.34                                   | 32.9                             |
| C-8       | 38.51                                   | 41.3                             |
| C-9       | 64.05                                   | 67.4                             |
| C-1'      | 131.04                                  | 128.4                            |
| C-2'      | 106.23                                  | 105.0                            |
| C-3'      | 147.66                                  | 145.2                            |
|           | 147.71                                  | 145.3                            |
| C-4'      | 133.38                                  | 132.7                            |
|           | 133.55                                  | 137                              |
| C-5'      | 147.66                                  | 145.3                            |
|           | 147.71                                  | 146.2                            |
| C-6'      | 106.23                                  | 106.1                            |
| C-7'      | 34.1                                    | 36.2                             |
| C-8'      | 42.7                                    | 47.6                             |
| C-9'      | 64.45                                   | 67.4                             |
| C-1''     | 124.49                                  | 124.8                            |

Table S5. continued

| Positions                     | Paper Citation                          | Reference                        |
|-------------------------------|-----------------------------------------|----------------------------------|
|                               | (150 MHz, DMSO- <i>d</i> <sub>6</sub> ) | (150 MHz, chloroform- <i>d</i> ) |
|                               | δ <sub>C</sub>                          | δ <sub>C</sub>                   |
| C-2''                         | 110.95                                  | 109.3                            |
| C-3''                         | 148.23                                  | 146.8                            |
| C-4''                         | 150.59                                  | 148.1                            |
| C-5''                         | 115.56                                  | 114.9                            |
| C-6''                         | 123.52                                  | 123.2                            |
| C-7''                         | 145.04                                  | 137.6                            |
| C-8''                         | 113.0                                   | 114.7                            |
| C-9''                         | 166.76                                  | 167.4                            |
| 3, 5, 3', 5'-OCH <sub>3</sub> | 55.75                                   | 56.3                             |
|                               | 55.8                                    |                                  |
| 3''-OCH <sub>3</sub>          | 55.59                                   | 56.3                             |

<sup>a</sup>Chen, T.H.; Huang, Y.H.; Lin, J.J. Cytotoxic lignan ester from *cinnamomum osmophloeum*. *Planta Med.* **2009**, *76*, 613-619.

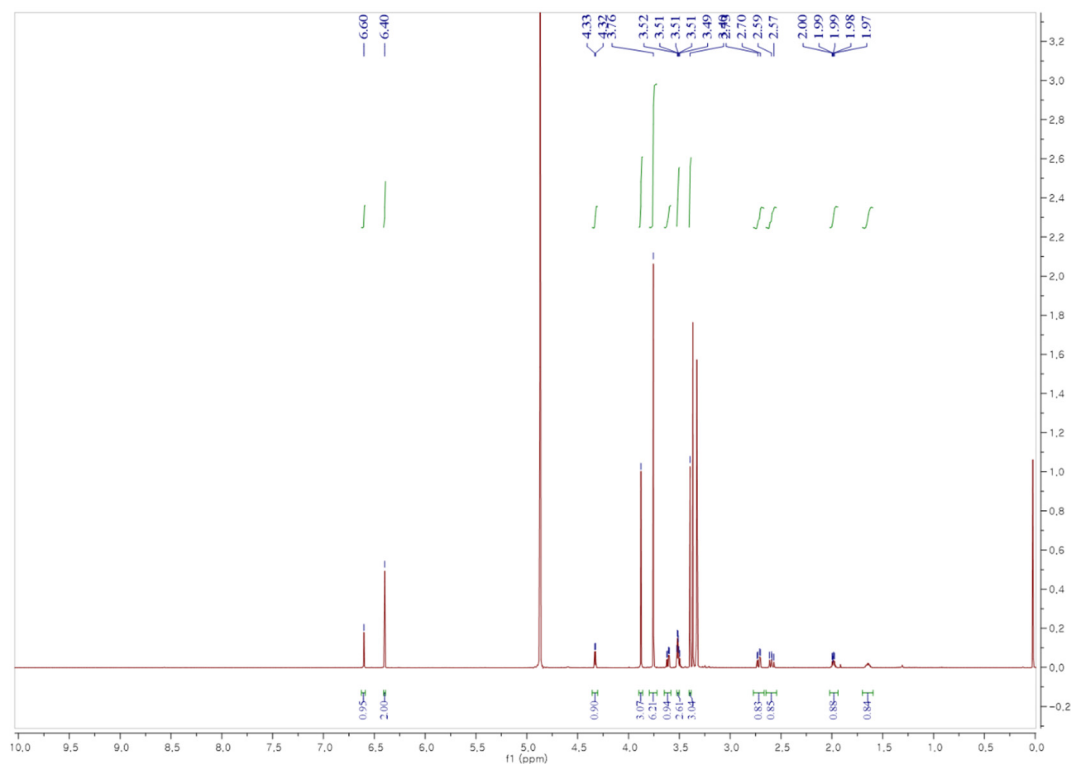

**Figure S11.** <sup>1</sup>H NMR spectrum of compound **6**

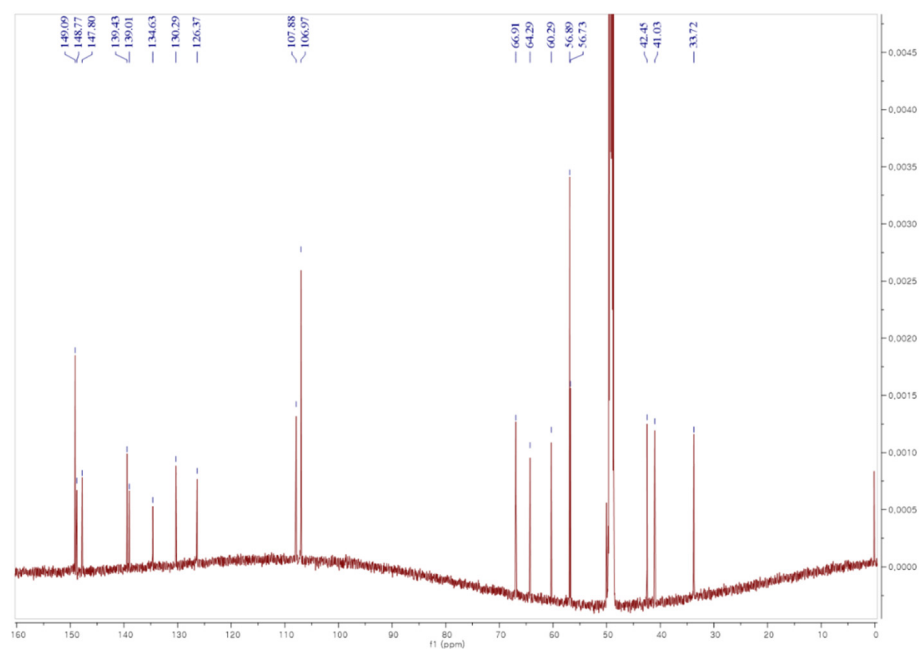

**Figure S12.** <sup>13</sup>C NMR spectrum of compound **6**

**Table S6.**  $^{13}\text{C}$  NMR spectrum data of compound **6**

| Positions               | Paper Citation                              | Reference <sup>a</sup>           |
|-------------------------|---------------------------------------------|----------------------------------|
|                         | (150 MHz, methanol- <i>d</i> <sub>4</sub> ) | (150 MHz, chloroform- <i>d</i> ) |
|                         | $\delta_{\text{C}}$                         | $\delta_{\text{C}}$              |
| C-1                     | 126.37                                      | 126.4                            |
| C-2                     | 130.29                                      | 129.8                            |
| C-3                     | 147.8                                       | 147.1                            |
| C-4                     | 139.01                                      | 138.6                            |
| C-5                     | 148.77                                      | 147.7                            |
| C-6                     | 107.88                                      | 107.1                            |
| C-7                     | 33.72                                       | 33.9                             |
| C-8                     | 41.03                                       | 41.2                             |
| C-9                     | 66.91                                       | 66.5                             |
| C-1'                    | 139.93                                      | 139.3                            |
| C-2'                    | 106.97                                      | 107.2                            |
| C-3'                    | 149.09                                      | 148.3                            |
| C-4'                    | 134.63                                      | 134.9                            |
| C-5'                    | 149.09                                      | 148.3                            |
| C-6'                    | 106.97                                      | 107.2                            |
| C-7'                    | 42.45                                       | 42.6                             |
| C-8'                    | 49.18                                       | 49.3                             |
| C-9'                    | 64.29                                       | 63.8                             |
| 3-OCH <sub>3</sub>      | 60.29                                       | 59.4                             |
| 5-OCH <sub>3</sub>      | 56.73                                       | 56.4                             |
| 3', 5'-OCH <sub>3</sub> | 56.89                                       | 56.8                             |

<sup>a</sup>Chen, T.H.; Huang, Y.H.; Lin, J.J. Cytotoxic lignan ester from *cinnamomum osmophloeum*. *Planta Med.* **2009**, 76.6, 613-619.

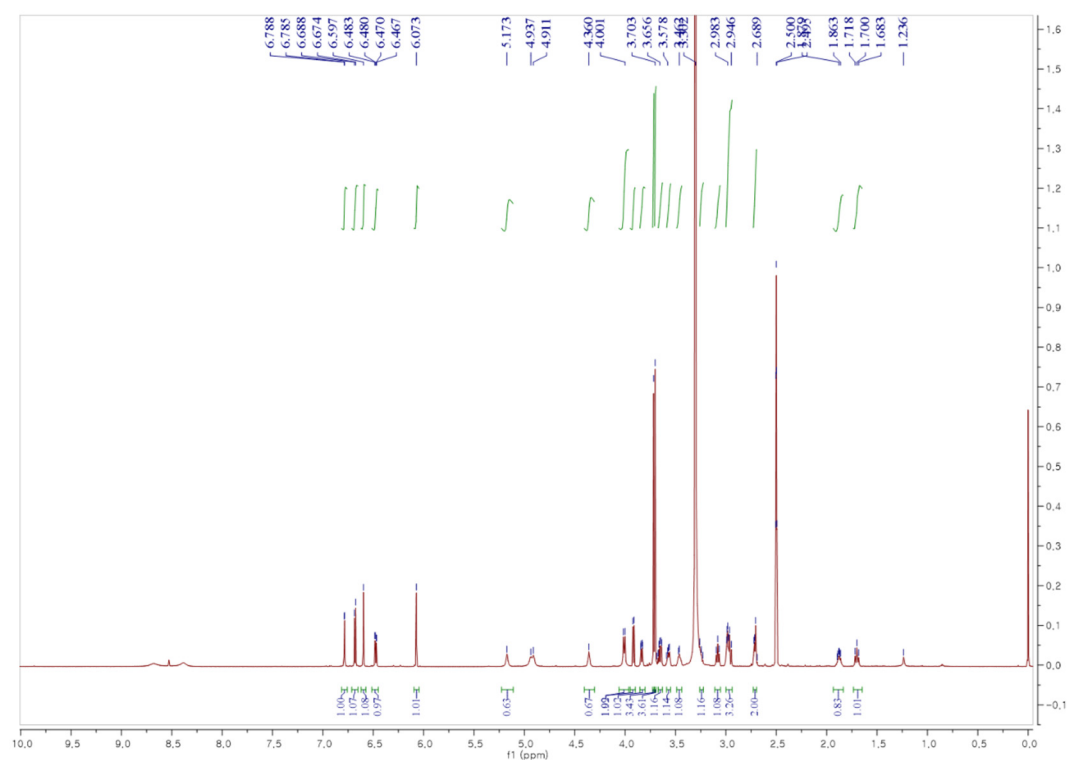

**Figure S13.**  $^1\text{H}$  NMR spectrum of compound 7

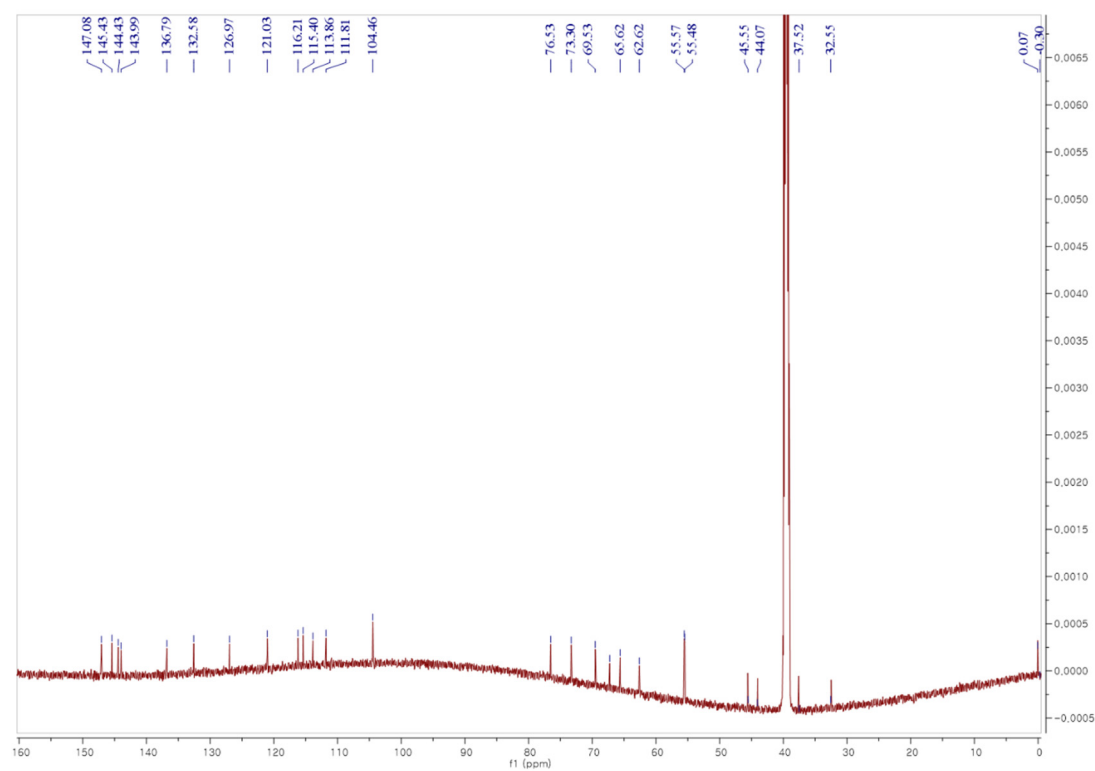

**Figure S14.**  $^{13}\text{C}$  NMR spectrum of compound 7

**Table S7.**  $^{13}\text{C}$  NMR spectrum data of compound **7**

| Positions | Paper Citation          | Reference <sup>a</sup>      |
|-----------|-------------------------|-----------------------------|
|           | (150 MHz, DMSO- $d_6$ ) | (125 MHz, methanol- $d_4$ ) |
|           | $\delta_{\text{C}}$     | $\delta_{\text{C}}$         |
| C-1       | 136.79                  | 137.9                       |
| C-2       | 113.86                  | 107.8                       |
| C-3       | 55.49                   | 56.7                        |
|           | 55.57                   |                             |
|           | 147.08                  |                             |
|           | 147.08                  |                             |
| C-4       | 144.43                  | 147.3                       |
| C-5       | 115.4                   | 112.3                       |
| C-6       | 121.03                  | 129.2                       |
| C-7       | 45.8                    | 49.5                        |
| C-8       | 44.86                   | 45.5                        |
| C-9       | 67.26                   | 70.0                        |
| C-1'      | 132.58                  | 134.9                       |
| C-2'      | 111.81                  | 107.8                       |
| C-3'      | 145.43                  | 149.10                      |
| C-4'      | 143.99                  | 145.3                       |
| C-5'      | 116.21                  | 117.3                       |
| C-6'      | 126.97                  | 133.6                       |
| C-7'      | 31.75                   | 33.8                        |
| C-8'      | 37.98                   | 40.4                        |
| C-9'      | 62.62                   | 65.3                        |
| C-1''     | 104.46                  | 104.8                       |
| C-2''     | 73.3                    | 74.9                        |
| C-3''     | 76.53                   | 78.0                        |
| C-4''     | 69.53                   | 71.3                        |
| C-5''     | 65.62                   | 67.0                        |

<sup>a</sup>Sadhu, S.K.; Khatun, A.; Phattanawasin, P.; Ohtsuki, T.; Ishibashi, M. Lignan glycosides and flavonoids from *Saraca asoca* with antioxidant activity. *J Nat Med.* **2007**, *61*, 480-482.

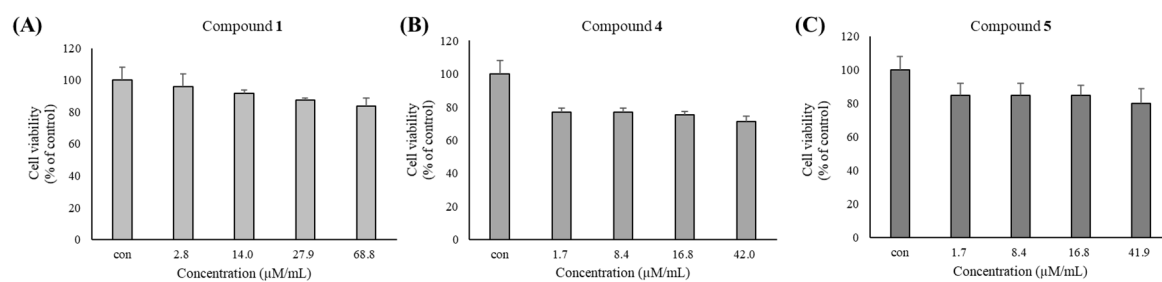

**Figure S15.** Cytotoxic activity of compounds. (A) Compound 1; (B) Compound 4; (C) Compound 5
